# Supplementary material
Source: PubMed Central journal article supplement (PMC2973325)
Supplement: NIHMS151757-supplement-Supplementary_Data.pdf [file NIHMS151757-supplement-Supplementary_Data.pdf]

Supplementary Information for

**Mutations of multiple genes cause deregulation of  
NF- $\kappa$ B in diffuse large B-cell lymphoma**

Mara Compagno<sup>1</sup>, Wei Keat Lim<sup>2</sup>, Adina Grunn<sup>1</sup>, Subhadra V.  
Nandula<sup>1,3</sup>, Manisha Brahmachary<sup>1</sup>, Qiong Shen<sup>1</sup>, Francesco  
Bertoni<sup>4</sup>, Maurilio Ponzoni<sup>5</sup>, Marta Scandurra<sup>4</sup>, Andrea Califano<sup>1,2</sup>,  
Govind Bhagat<sup>1,3</sup>, Amy Chadburn<sup>6</sup>, Riccardo Dalla-Favera<sup>1,3,7</sup> and  
Laura Pasqualucci<sup>1,3</sup>

<sup>1</sup> Institute for Cancer Genetics and the Herbert Irving Comprehensive Cancer Center, Columbia University, New York, NY, 10032.

<sup>2</sup> Joint Centers for Systems Biology, Columbia University, New York, NY, 10032.

<sup>3</sup> Department of Pathology & Cell Biology, Columbia University, New York, NY, 10032.

<sup>4</sup> Laboratory of Experimental Oncology and Lymphoma Unit, Oncology Institute of Southern Switzerland (IOSI), Bellinzona, 6500, Switzerland.

<sup>5</sup> Pathology Unit, Unit of Lymphoid Malignancies, San Raffaele Scientific Institute, Milan, 20132, Italy.

<sup>6</sup> Department of Pathology and Laboratory Medicine, Weill Medical College of Cornell University, New York, NY 10021.

<sup>7</sup> Department of Genetics & Development, Columbia University, New York, NY, 10032.

Correspondence should be addressed to: L.P. ([lp171@columbia.edu](mailto:lp171@columbia.edu))

## SUPPLEMENTARY METHODS

**Cell lines.** The following DLBCL cell lines were used in the study: OCI-Ly3, OCI-Ly10, HBL1, SUDHL-2, U2932, RIVA, RC-K8, OCI-Ly2, OCI-Ly4, OCI-Ly7, SUDHL-4, SUDHL-5, SUDHL-6, SUDHL-7, SUDHL-8, SUDHL-10, DB, FARAGE, VAL and WSU. Cells were maintained in Iscove's Modified Dulbecco Medium (IMDM) (Invitrogen) supplemented with 10% fetal calf serum, 100 U/ml penicillin, 100 U/ml streptomycin and 2mM L-glutamine. The OCI-Ly10 line was cultured in IMDM with 20% heparinized human plasma and 55 $\mu$ M  $\beta$ -mercaptoethanol.

**Tumor samples.** Frozen specimens from 155 newly diagnosed, previously untreated DLBCL patients were obtained from the archives of the Departments of Pathology at Columbia University and Weill Cornell Medical College, after approval by the respective Institutional Review Boards. The fraction of tumor cells, assessed by Southern blot analysis of the rearranged immunoglobulin heavy chain locus and/or by analysis of frozen sections isolated before and after obtaining tissue for molecular studies, corresponded to >80% in most of the cases and to >50% in all cases. Adequate material for simultaneous extraction of DNA and RNA was available from 77 samples, which were characterized by gene expression profile analysis; the remaining samples were classified using immunohistochemical stains as described below. Genomic DNA from 15 additional DLBCL patients was included in the *A20* mutation analysis.

**High-Density SNP Array analysis for *A20* copy number determination.** Genome-wide DNA profiles were obtained from high molecular weight genomic DNA of DLBCL patients using the GeneChip Human Mapping 250K-Nsp arrays and the Affymetrix Genome-Wide Human SNP Array 6.0 (Affymetrix, Santa Clara, CA, USA) following the manufacturer's instructions. A diploid reference set of 46 Caucasian normal female samples from the HapMap Project was used as a reference set for copy number estimation. For the 250K-Nsp arrays, data acquisition was performed using the Affymetrix GCOS 1.4 and GTYPE 4.1 software as described<sup>36</sup>. Genotype calls were calculated using the BRLMM algorithm within a data set of over 100 B-cell tumors analyzed in house to improve the genotype call. The Affymetrix CNAT version 4.0.1 software and the Hidden Markov Model were used to calculate copy numbers (CN) starting from the BRLMM-CHP files. Analyses were performed using CN Gaussian bandwidth of 100 Kb and LOH transition decay of 10Mb. Gains and losses were defined in the presence of CN above 2.1 and CN below 1.9, respectively. For the SNP 6.0 arrays, image data analysis and quality control for the hybridized samples were performed using the Affymetrix Genotyping Console 3.0.1 software. Only samples passing the Affymetrix recommended contrast QC and SNP call rates threshold (in the Birdseed v2.0 algorithm) were considered for analysis. Copy number determination was performed using the Partek Genomics Suite 6.08 software (<http://www.partek.com/>). To identify regions of amplification and deletion, the genomic segmentation algorithm of Partek was implemented with the following parameters: minimum of ten genomic markers at a p-value of 0.001 and a signal to noise ratio of 0.3. A p-value of 0.01 was used to filter for

regions of interest from the segmentation results.

**Expression constructs.** The pIII-Luc NF- $\kappa$ B reporter construct, containing two NF- $\kappa$ B canonical binding sites from the MHCII promoter, was obtained from David Baltimore. Plasmids encoding HA-tagged wild-type A20, CARD11, TRAF2, TRAF5 and TAK1 proteins were constructed by introducing the corresponding Pfu-PCR amplified human cDNAs into the pCMV-HA vector (Clontech), in frame with HA. These plasmids served as templates to generate various DLBCL-associated mutant constructs, using the QuickChange site-directed mutagenesis kit (Stratagene). The lentiviral expression constructs FUGW-HA-TRAF2 and FUGW-HA-TRAF2-P186R were obtained by subcloning the corresponding full-length cDNA sequences into the HpaI restriction site of the FUGW vector<sup>35</sup>, in front of an IRES-GFP sequence. All final constructs were verified by enzymatic digestion and confirmed by DNA sequencing.

**Transient transfections/reporter gene assays.** Transfection of 293T cells was performed by the calcium-phosphate precipitation method as previously described<sup>28</sup>, using 0.1  $\mu$ g of the pIII-Luc reporter construct and the indicated doses of wild-type and mutant expression vectors. The total amount of transfected DNA was kept constant in each experiment by adding pCMV-HA vector sequences to a final amount of 2.1  $\mu$ g/35mm plate. All experiments were performed in duplicate and luciferase activities were measured forty-eight hours after transfection using the Dual-Luciferase Reporter Assay Kit (Promega), according to the manufacturer's instructions.

**Protein extraction and western blot analysis.** Whole cell extracts were prepared in RIPA buffer as described<sup>28</sup> and analyzed by Western blot according to standard methods,

with the following primary antibodies: anti-NF-kappaB2 p100/p52(18D10) (Cell Signaling Technology), anti-HA(3F10) (Roche), anti-TRAF2(H10) (Santa Cruz Biotechnology), anti-GFP (JL-8) (Clontech), anti- $\beta$ -actin (A5441) and anti- $\beta$ -tubulin (clone B-5-1-2)(Sigma). The endogenous A20 protein was detected using a mouse monoclonal anti-A20 antibody (clone 59A426; eBioscience). Proteins were visualized using a chemiluminescence detection kit (Pierce) as recommended by the manufacturer.

## LEGENDS TO SUPPLEMENTARY FIGURES

**Supplementary Figure 1. Experimental Strategy used for the NF- $\kappa$ B Mutations Discovery Screen and Validation Screen.**

**Supplementary Figure 2. Lack of A20 protein expression in DLBCL samples carrying genetic inactivation of the *A20* gene.** **a**, Diagram of the wild-type A20 protein, with its relevant functional domains; the Serine 381 residue reported to be phosphorylated by IKK $\beta$  is also indicated<sup>37</sup>. The predicted A20 polypeptides in two cell lines carrying biallelic truncating mutations of the *A20* gene are aligned below, and their molecular weight is given on the right. In the RC-K8 derived N720 allele, a frameshift deletion T at position +2227 leads to an aberrant cDNA sequence utilizing a novel 3' stop codon and encoding for a longer chimeric protein that retains the N-terminal 720 amino acids of the original A20 polypeptide, fused to 94 unrelated residues (grey segment). **b**, Western blot analysis of A20 expression in representative ABC- and GCB-DLBCL cell lines (+/+, *A20* wild-type; +/-, *A20* monoallelic deletion; m/m, *A20* biallelic mutation).  $\beta$ -tubulin is used as protein loading control. The arrow points to the correct size of the full-length A20 protein, while asterisks indicate a non specific band of approximately 60kD, occasionally detected in cell lines (see also Coornaert et al., 2008)<sup>38</sup>; RT-PCR amplification and sequencing of the A20 full length cDNA from the same samples did not show any evidence of additional alterations that may suggest the presence of alternative, smaller transcripts (not shown). Note the expression of the endogenous truncated A20 mutant proteins N720 and S459X in RC-K8 and SUDHL2, respectively.

As expected, the inducible A20 protein, which is itself a target of NF- $\kappa$ B, is not expressed in most GCB-DLBCL samples, where NF- $\kappa$ B is not active. **c**, Western blot analysis of A20 expression in primary DLBCL biopsies carrying wild-type (+/+) or abnormal *A20* alleles (m/-, inactivating mutation of one allele with deletion of the second copy; -/-, homozygous deletion). The cell line Ly7 is used as positive control.  $\beta$ -actin monitors for protein loading.

**Supplementary Figure 3. *A20* mutations abrogate its ability to negatively regulate NF- $\kappa$ B.** **a**, Schematic representation of the A20 expression constructs used in transient transfection assays. Mutants carrying frameshift deletions are denoted by the letter N, followed by the amino acid length of the residual A20 protein. **b**, Western blot analysis of exogenous A20 expression in 293T cells, transfected with equimolar amounts (0.2 $\mu$ g) of the constructs shown in (a). Short and long exposures are shown for the anti-HA western blot. The anti-A20 antibody used recognizes an epitope in the middle portion of the A20 protein; thus, truncated mutants lacking the C-terminal amino acids 450-790 cannot be detected. Western blot analysis of GFP expression, co-transfected as control, documents comparable transfection efficiencies;  $\beta$ -actin controls that equal amounts of protein were loaded. Note the significantly lower levels of the N720 protein with respect to wild-type (WT) A20, despite expression of comparable mRNA levels, measured by semi-quantitative RT-PCR on increasing number of cycles (bottom two panels). These results suggest that, despite retaining most of its coding domains, the N720 mutant is functionally defective, due to protein instability. **c**, NF- $\kappa$ B inhibitory activity of wild-type and mutant A20 proteins in 293T cells co-transfected with the NF- $\kappa$ B luciferase reporter



vector pIII-Luc, a MYC-tagged TRAF2 expression vector, and the A20 mutant constructs M2-M8, the amounts of which had been titrated to obtain comparable protein expression levels. Data are reported as relative fold induction compared to the activity of the reporter only, arbitrarily set as 1, and are representative of three independent experiments performed in duplicate, with error bars indicating standard deviations. In the bottom panels, western blot analysis using anti-HA antibodies documents that comparable levels of exogenous A20 protein were expressed for each mutant.  $\beta$ -actin controls for loading. Note that all A20 mutants tested were significantly impaired in their ability to negatively regulate TRAF2-induced NF- $\kappa$ B activation.

**Supplementary Figure 4. *A20* deletions in DLBCL primary biopsies.** **a**, Distribution of SNP markers represented in the Affymetrix GeneChip Human Mapping 250K-Nsp array and the Affymetrix Genome-Wide Human SNP array 6.0. **b**, Copy number heatmap showing deletions encompassing the *A20* gene in 7 representative DLBCL primary cases, as compared to two control normal samples (N). The boxed area defines the minimal deleted region, corresponding to a focal homozygous deletion identified in sample 2110 and spanning two genes: *A20* and *OLIG3* (arrows). Since *OLIG3* is not expressed in B cells (our own data on Affymetrix U133Plus\_2 oligonucleotide arrays, and EST profile at <http://www.ncbi.nlm.nih.gov>), these findings point to *A20* as the target of the deletion. \* region shown in panel (c). **c**, Higher magnification of the copy number heatmap from DLBCL samples 2110 and 2170, and two normal DNAs (top panel). The total copy number intensity ratio is illustrated in the middle panel, and the *A20* and *OLIG3* genes are aligned below. A black line in the copy number plot indicates the

normal (baseline) intensity of 2. **d**, Total copy number plots of four DLBCL samples harboring small 6q23 deletions encompassing the *A20* gene (boxed area). The ideogram of the long arm of chromosome 6 is aligned below the plots.

**Supplementary Figure 5. Lentiviral transduction of A20 expressing constructs in cell lines carrying functionally inactive *A20* alleles.** Western blot analysis of A20 and  $\beta$ -actin expression in three DLBCL cell lines, untransduced (UT) and transduced with lentiviral vectors expressing GFP alone (pWPI) or HA-tagged A20 linked to GFP via an IRES element (pWPI-HA-A20). SUDHL4 and SUDHL7 are GCB-DLBCL cell lines that carry an intact *A20* locus. The Burkitt lymphoma cell line P3HR1, stimulated with CD40 to induce NF- $\kappa$ B activation (and expression of its target gene *A20*), was used as control for physiologic levels of endogenous A20. The arrow points to the endogenous, truncated A20 protein expressed in the A20 functionally deficient SUDHL2 cell line.

**Supplementary Figure 6. Missense mutations of *CARD11* and *TRAF2* lead to enhanced NF- $\kappa$ B activation.** **a**, Schematic representation of the constructs used in transient transfection/luciferase reporter assays (R, zinc finger RING-type domain; TZ, zinc finger TRAF-type domain; MATH, meprin and TRAF homology domain; CARD, caspase-associated recruitment domain; SH3, Src homology domain; GUK, [membrane-associated] guanylate kinase homology domain). **b**, Enhanced NF- $\kappa$ B activity of DLBCL-derived *CARD11* mutant proteins. The reporter construct indicated in (a) was transfected into 293T cells, alone or in the presence of equal amounts of wild-type (WT) and mutant (M1-M5) *CARD11*-expressing plasmids. The M1 (L251P) construct harbors

a missense mutation previously reported to confer enhanced NF- $\kappa$ B activity<sup>3</sup>, and was included as internal control. Luciferase activities, measured forty-eight hours after transfection, showed  $\geq 2$  fold increase of the reporter gene in extracts obtained from all five CARD11 mutants, as compared to CARD11-WT (mean  $\pm$  standard deviation; n=3)(top panel). Western blot analysis of HA expression documents comparable levels of protein in all samples except M5 (D357V), which cannot be detected likely due to protein instability (see comparable cDNA expression levels by semi-quantitative RT-PCR in the bottom panels). GFP shows comparable transfection efficiencies, and  $\beta$ -actin controls for loading. **c**, Mutations of TRAF2 potentiate its ability to transactivate NF- $\kappa$ B in 293T cells. Significantly enhanced, dose-dependent induction of the reporter gene by the ABC-DLBCL associated TRAF2-P186R mutant protein (black bars, lanes 8-10), as compared to TRAF2-WT (grey bars, lanes 5-7). In the bottom panels, western blot analysis using anti-HA antibodies, which detect both WT and mutant TRAF2, controls that equivalent amounts of proteins were expressed. Comparable NF- $\kappa$ B activity could be achieved by expressing approximately 5-fold higher amounts of the WT protein (lanes 2-4).  $\beta$ -Actin was used as protein loading control. Data are representative of three independent experiments performed in duplicate. **d**, Increased NF- $\kappa$ B activity of the TRAF2-P186R mutant *in vivo*. The DLBCL cell line SUDHL6 was engineered to express HA-tagged WT and mutant TRAF2 proteins via lentiviral transduction, and analyzed for the presence of active nuclear NF- $\kappa$ B complexes by immunofluorescence staining of NFKB1/p50 (red, left panels), in the absence of further stimuli. Nuclei were counter stained with DAPI (blue, middle panels) and the merged images are shown on the right. Nuclear p50 localization, indicative of active NF- $\kappa$ B signaling, was detected in the majority (~60%) of

TRAF2-P186R-transduced cells (bottom right panel), but not in cells expressing TRAF2-WT, where p50 is restricted to the cytoplasm (top right panel).

#### REFERENCES TO SUPPLEMENTARY MATERIAL

36. Forconi, F. *et al.* High density genome-wide DNA profiling reveals a remarkably stable profile in hairy cell leukaemia. *Br. J. Haematol.* **141**, 622-630 (2008).
37. Hutti, J.E. *et al.* I $\kappa$ B Kinase  $\beta$  phosphorylates the K63 deubiquitinase A20 to cause feedback inhibition of the NF- $\kappa$ B pathway. *Mol. Cell. Biol.* **27**, 7451-7461 (2007).
38. Coornaert, B. *et al.* T cell antigen receptor stimulation induces MALT1 paracaspase-mediated cleavage of the NF-kappaB inhibitor A20. *Nature Immunol* **9**, 263-271 (2008).

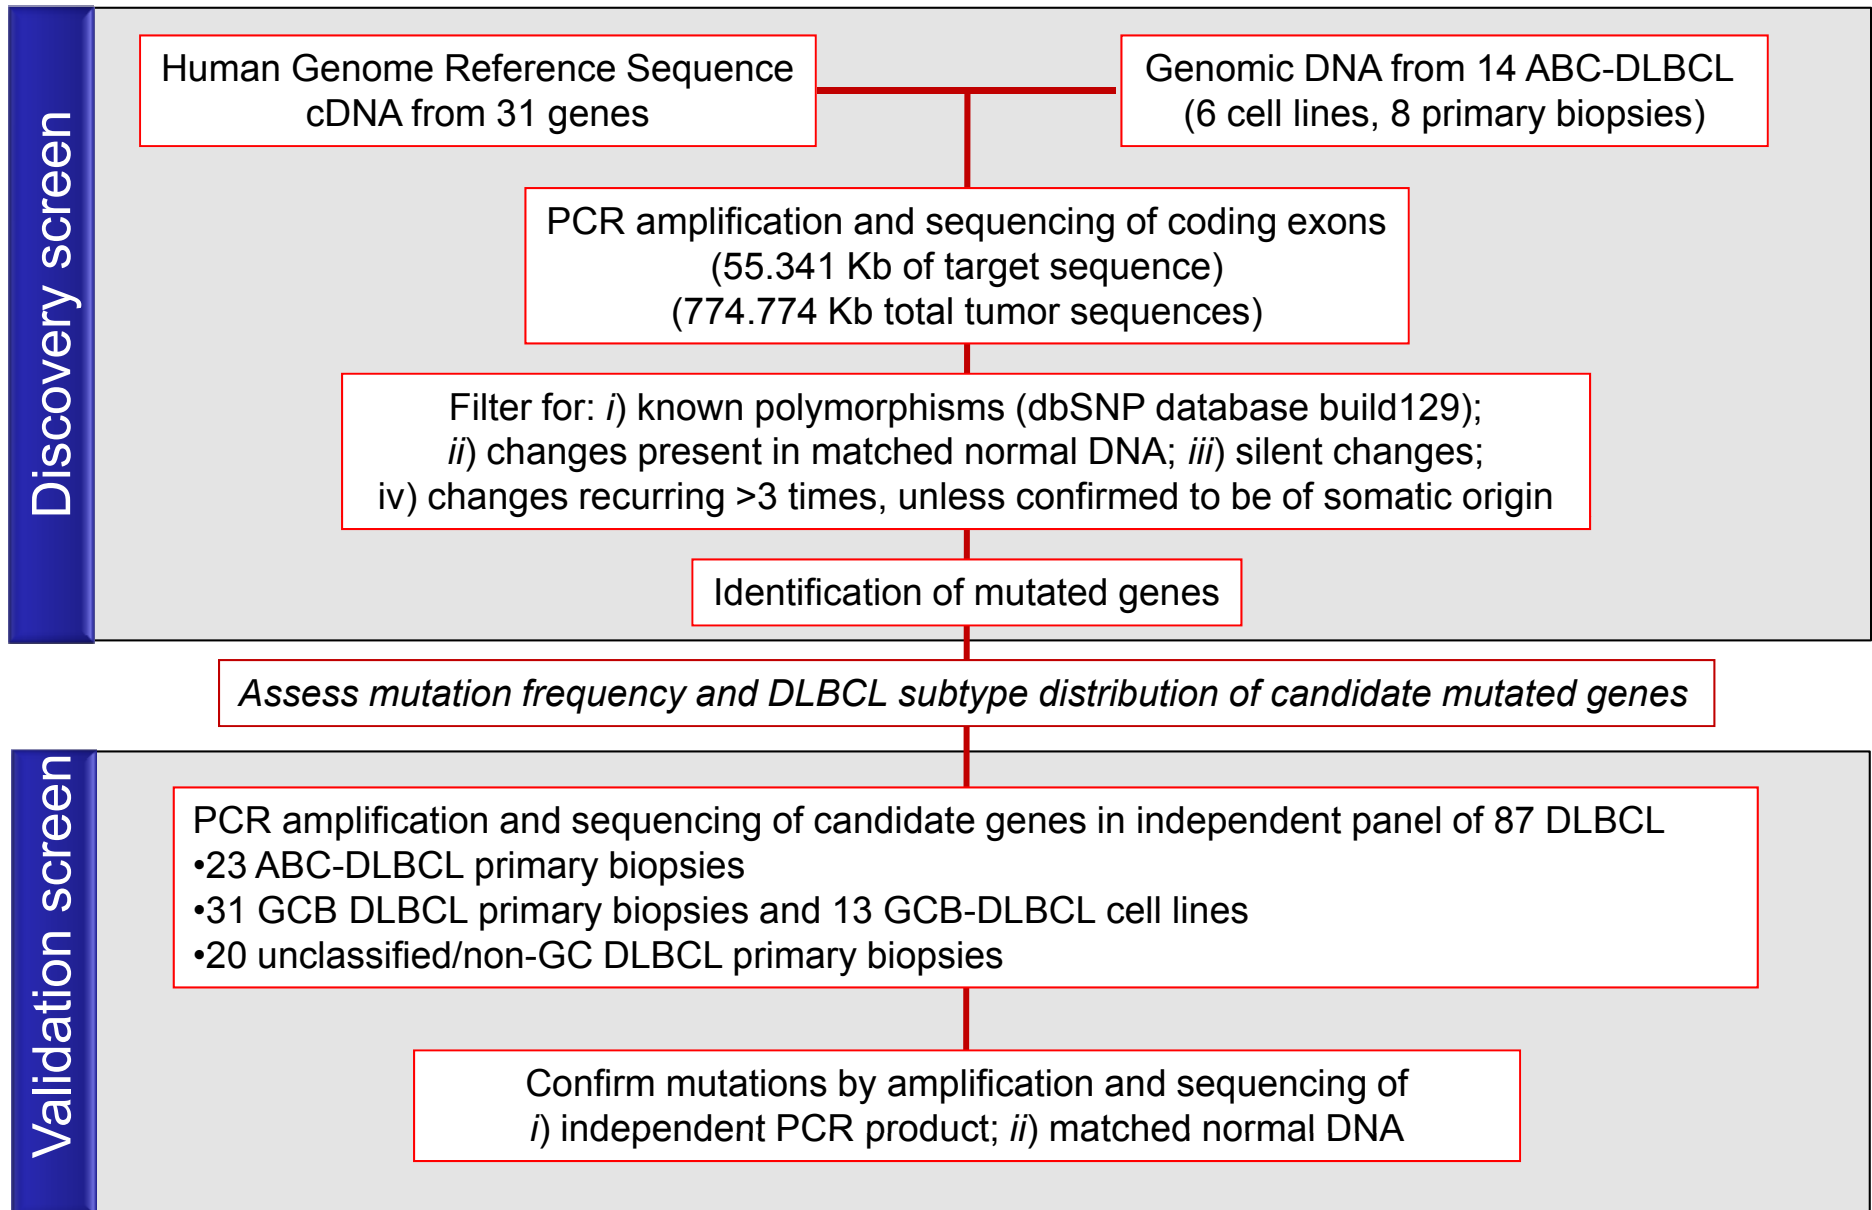

**Supplementary Figure 1.** Experimental Strategy used for NF-κB Mutations Discovery Screen and Validation Screen

**a.**

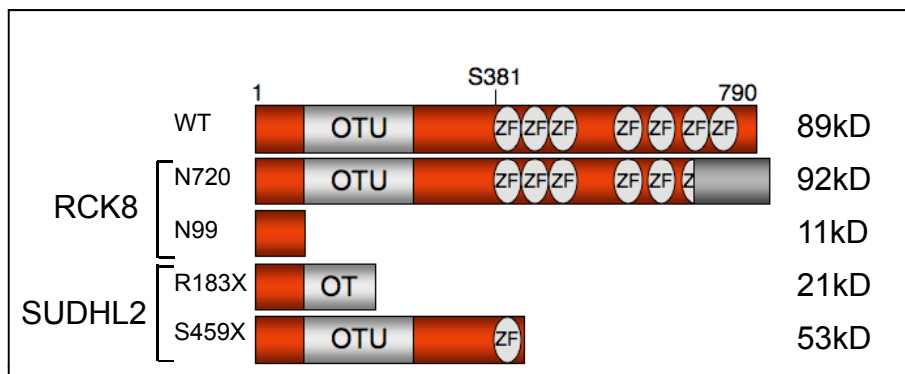

**b.**

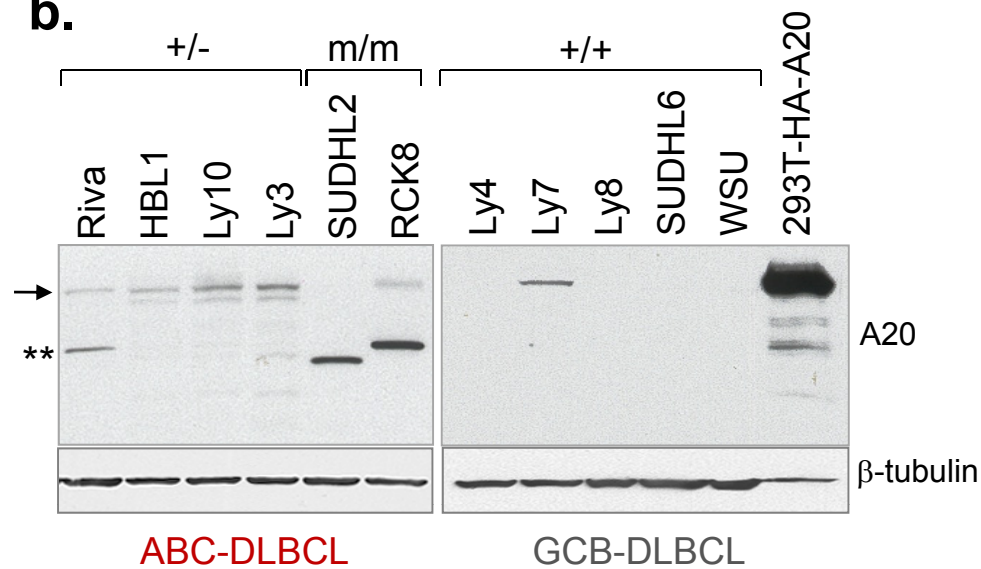

**c.**

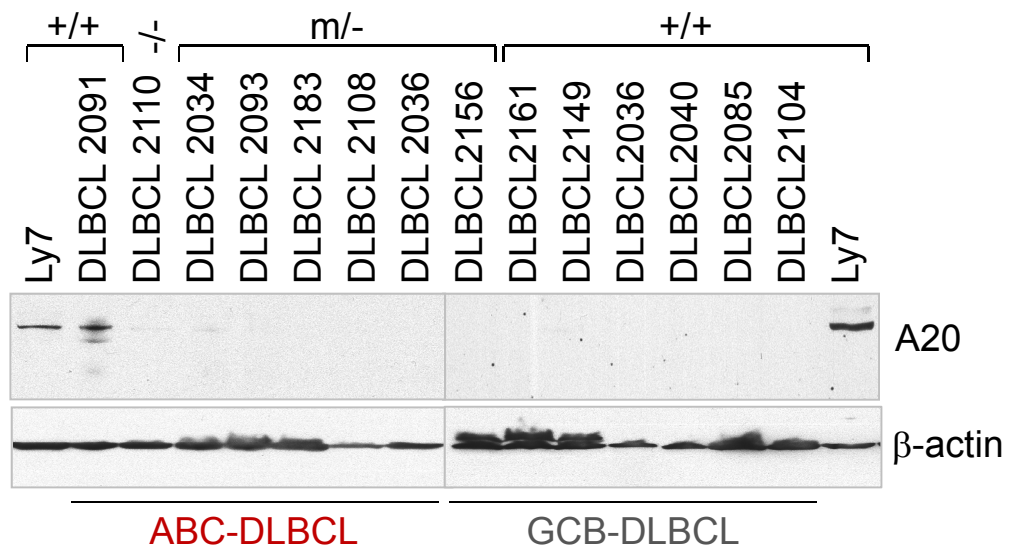

**a.**

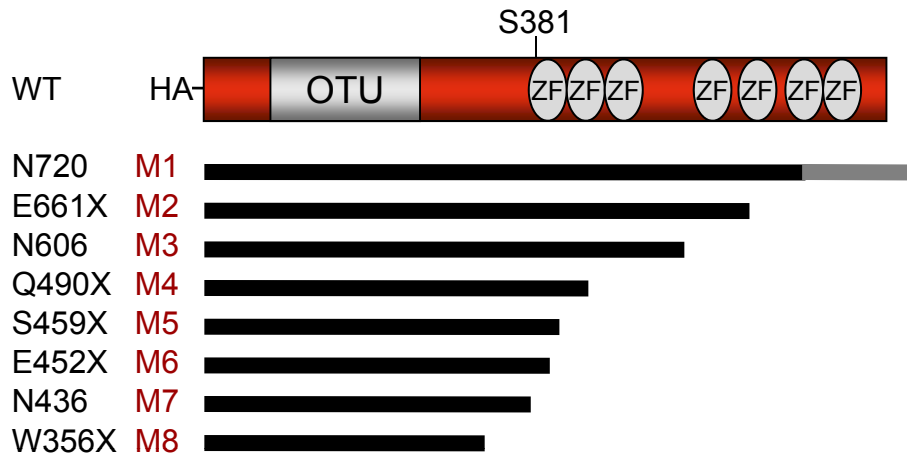

**b.**

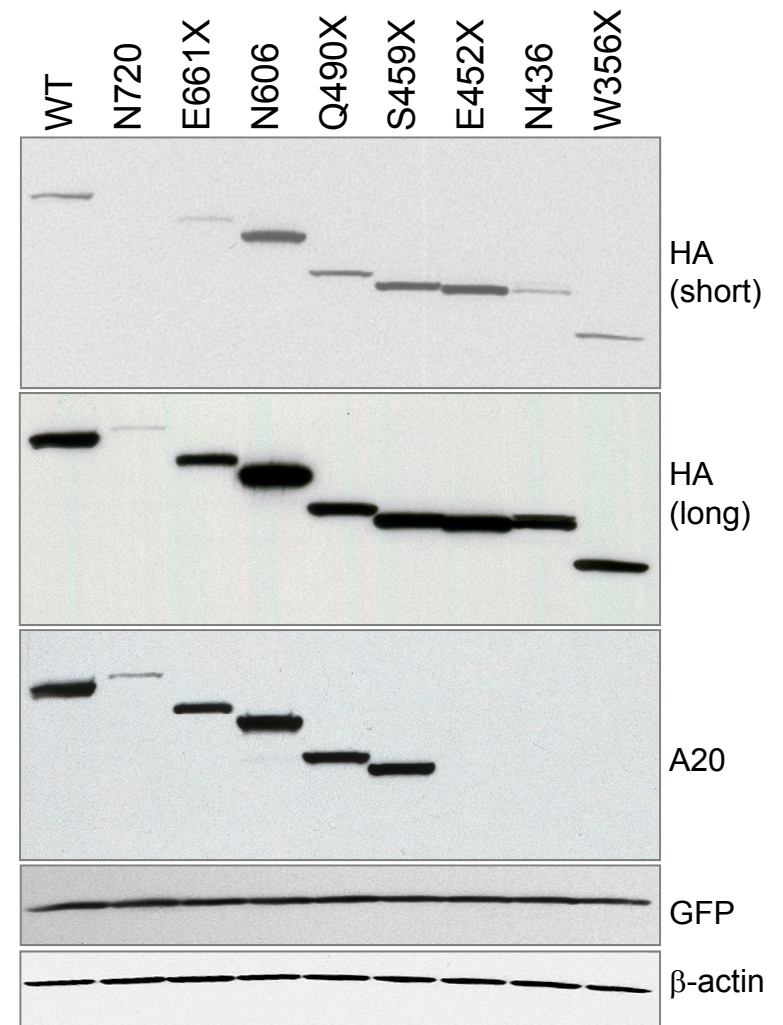

**c.**

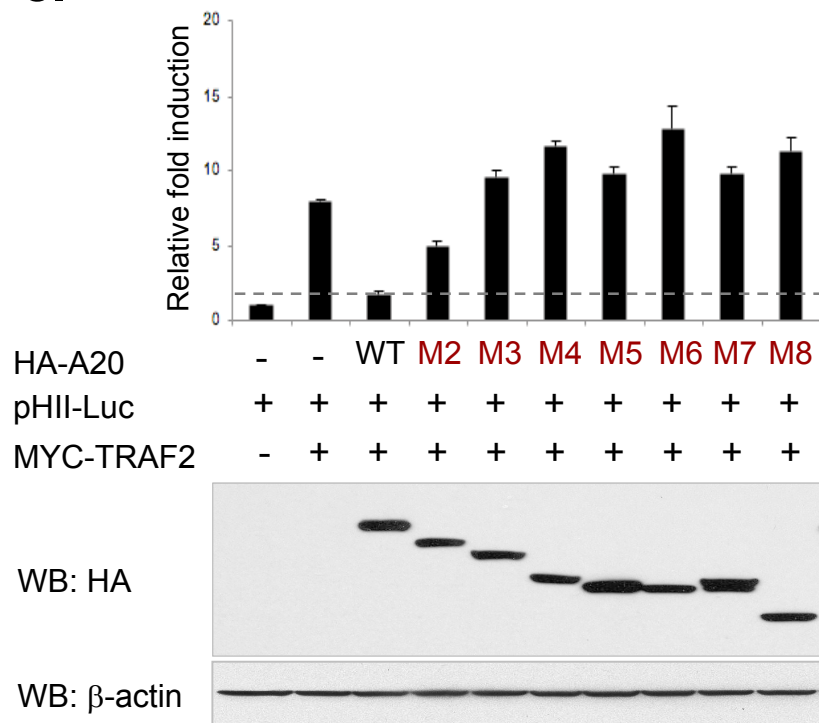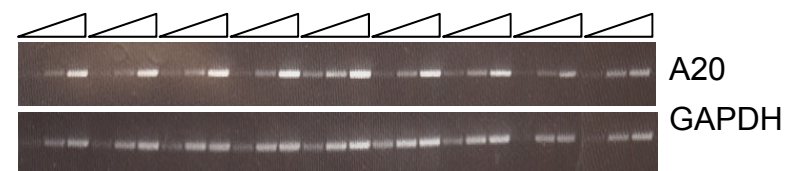



**a.**

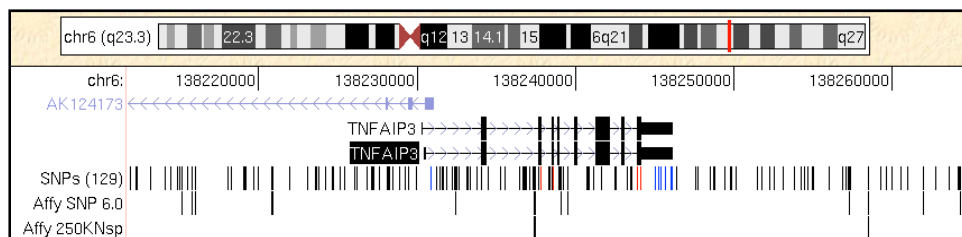

**b.**

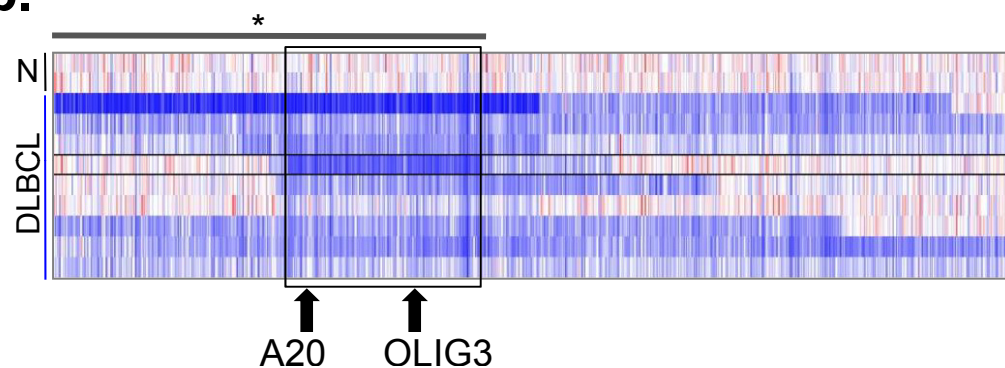

**c.**

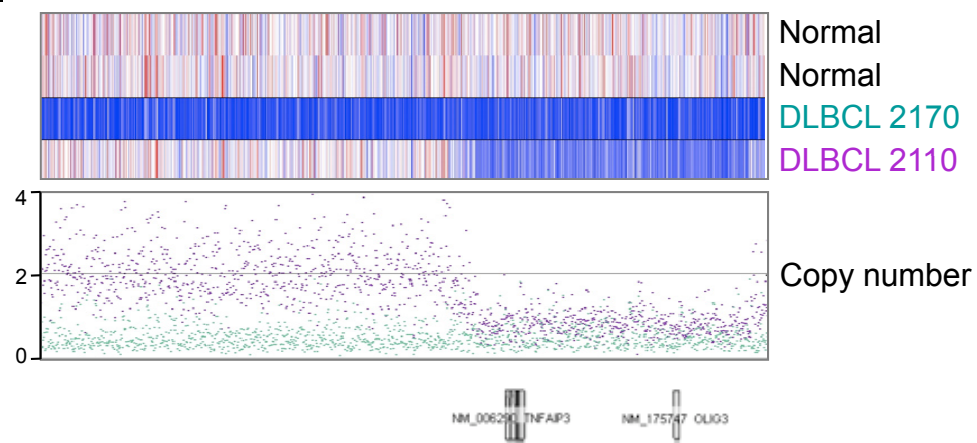

**d.**

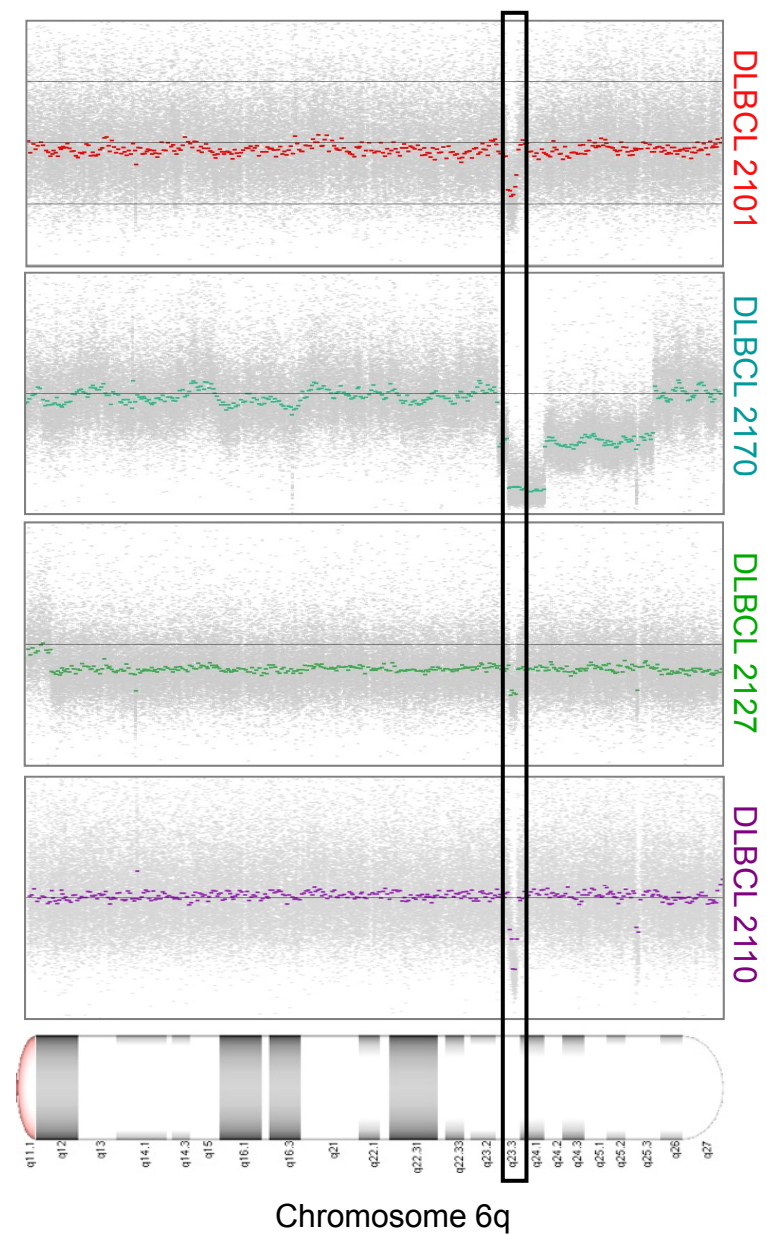



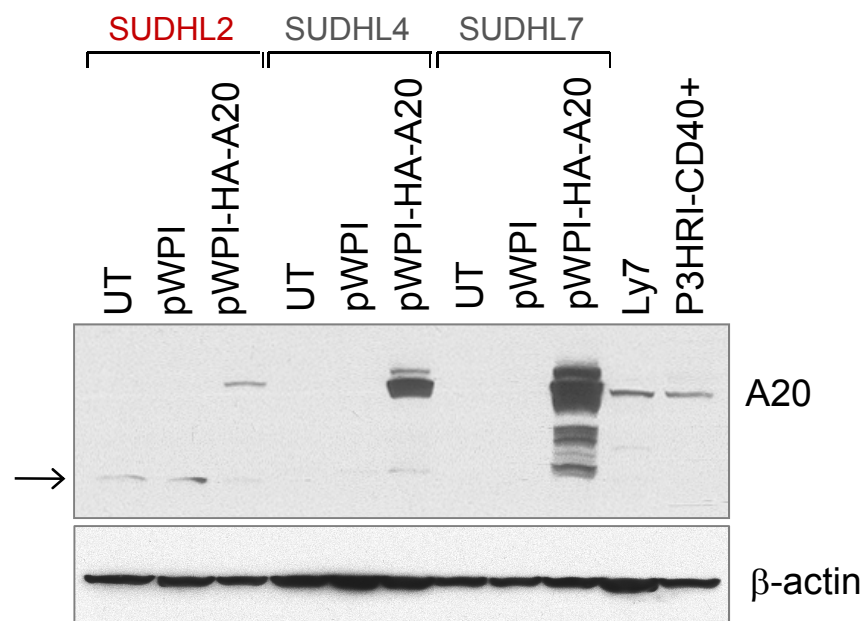

■ ABC-DLBCL, A20<sup>m/m</sup>  
■ GCB-DLBCL, A20<sup>wt/wt</sup>

**a.**

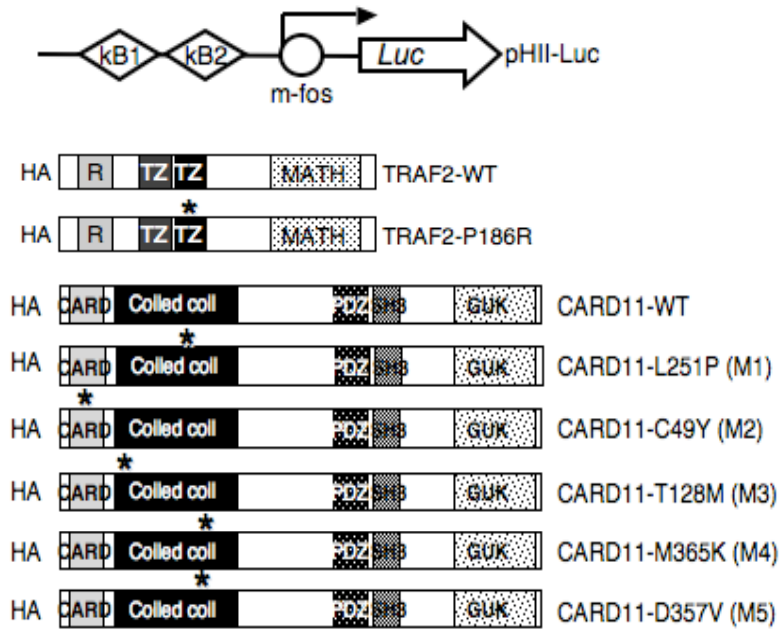

**b.**

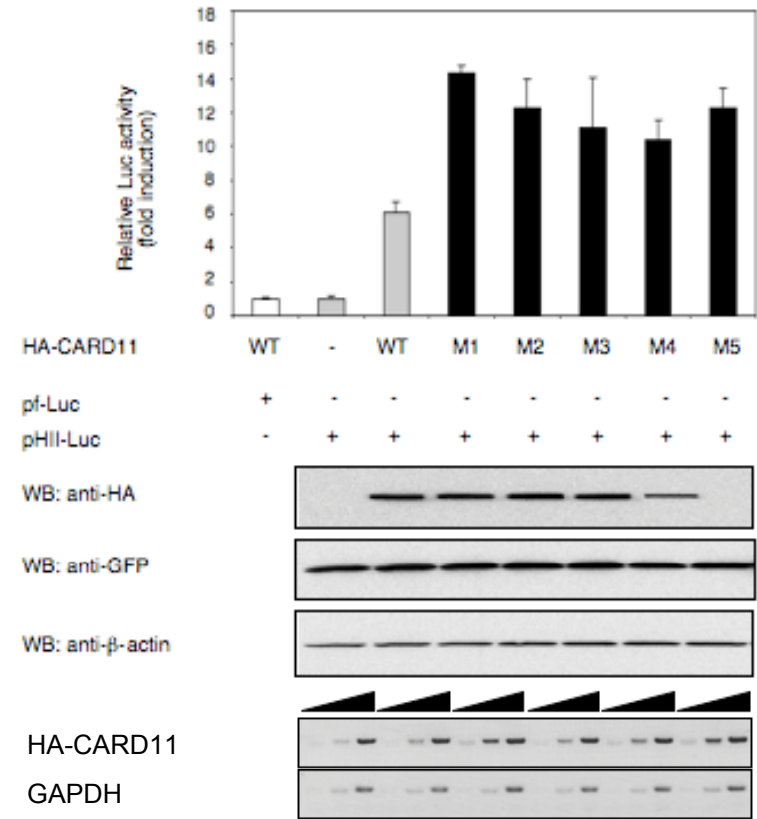

**c.**

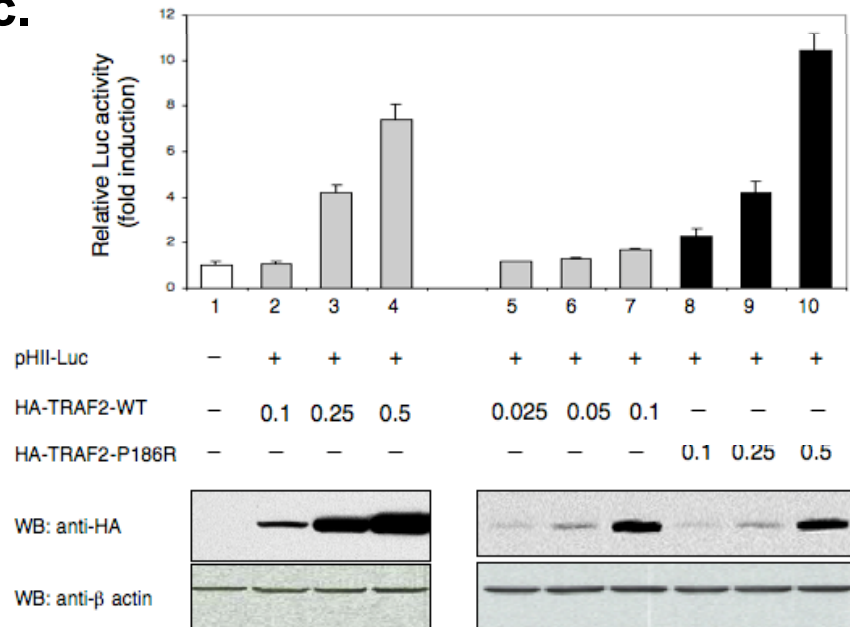

**d.**

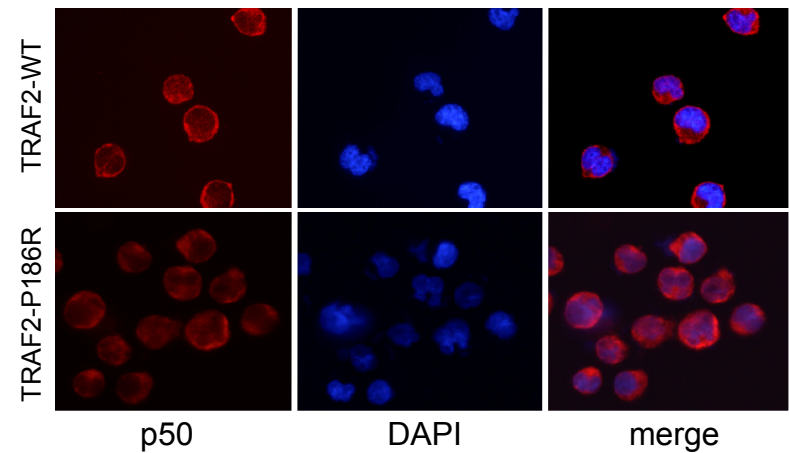

**Table S1.** NF-kB target Gene Set used for GSEA

| #  | Gene Symbol | Reference | #   | Gene Symbol | Reference |
|----|-------------|-----------|-----|-------------|-----------|
| 1  | AHR         | 5         | 61  | IL4RA       | 6         |
| 2  | BANK1       | 5         | 62  | IL4RB       | 5         |
| 3  | BATF        | 3,5       | 63  | IL6         | 1,3,5     |
| 4  | BCL2        | 1,2       | 64  | IL8         | 1,5       |
| 5  | BCL2A1      | 1,4,5     | 65  | IRF1        | 1,5       |
| 6  | BCL2L1      | 1,5       | 66  | IRF4        | 1,2,3,4,5 |
| 7  | BIRC2       | 1,6       | 67  | JUNB        | 1,3,5     |
| 8  | BIRC3       | 1,3,4,5   | 68  | KLF10       | 6         |
| 9  | BUB1B       | 5         | 69  | LITAF       | 5         |
| 10 | C6ORF32     | 3,4,5     | 70  | LSP1        | 6         |
| 11 | CCL2        | 6         | 71  | LTA         | 4,5       |
| 12 | CCL22       | 4         | 72  | LYN         | 3,5       |
| 13 | CCL3        | 1         | 73  | MAP3K1      | 5         |
| 14 | CCL4        | 1,5       | 74  | MAP3K8      | 1,5       |
| 15 | CCND2       | 1,2,5     | 75  | MIRN155     | 3,5       |
| 16 | CCR4        | 5         | 76  | MYB         | 6         |
| 17 | CCR7        | 2,3,5     | 77  | NCF2        | 5         |
| 18 | CD36        | 5         | 78  | NCL         | 5         |
| 19 | CD40        | 4,5       | 79  | NFKB1       | 4,5       |
| 20 | CD40LG      | 5         | 80  | NFKB2       | 1,4,5     |
| 21 | CD44        | 1,3,4,5   | 81  | NFKBIA      | 1,2,3,4,5 |
| 22 | CD69        | 1,6       | 82  | NFKBIE      | 1,5       |
| 23 | CD82        | 1         | 83  | PASK        | 6         |
| 24 | CD83        | 1,4,5     | 84  | PBEF1       | 5         |
| 25 | CEP110      | 5         | 85  | PECAM1      | 1,6       |
| 26 | CFLAR       | 1,2,3,5   | 86  | PIM1        | 4,5       |
| 27 | CISH        | 5         | 87  | PIM2        | 5         |
| 28 | CSF2        | 1         | 88  | PLEK        | 5         |
| 29 | CX3CL1      | 6         | 89  | PRKCD       | 6         |
| 30 | CXCL1       | 6         | 90  | PRPF4B      | 5         |
| 31 | CXCL10      | 3,4,5     | 91  | PTGS2       | 6         |
| 32 | CXCL13      | 3,5       | 92  | PTPN1       | 1         |
| 33 | CXCL2       | 1         | 93  | PTPN3       | 5         |
| 34 | CXCL9       | 3,4,5     | 94  | RASGRP1     | 3,5       |
| 35 | CXCR7       | 5         | 95  | REL         | 1,6       |
| 36 | DUSP1       | 6         | 96  | RELB        | 1,5       |
| 37 | DUSP2       | 1,4       | 97  | RET         | 5         |
| 38 | EBI2        | 3,5       | 98  | RFTN1       | 4         |
| 39 | EBI3        | 4,5       | 99  | RGS1        | 1,5       |
| 40 | EGR1        | 6         | 100 | RRAS2       | 6         |
| 41 | ELL2        | 5         | 101 | SDC4        | 1,6       |
| 42 | EMR1        | 6         | 102 | SELL        | 3,5       |
| 43 | FAS         | 6         | 103 | SLAMF7      | 5         |
| 44 | FCER        | 1         | 104 | SLC2A5      | 6         |
| 45 | FGF12       | 5         | 105 | SMAD7       | 6         |
| 46 | FNDC3A      | 5         | 106 | SMARCA2     | 4,5       |
| 47 | GADD45B     | 3,4       | 107 | SOCS2       | 3,5       |
| 48 | HLA-F       | 6         | 108 | SOD2        | 6         |
| 49 | HSPA1L      | 5         | 109 | SPI1        | 1,4,5     |
| 50 | ICAM1       | 1,4,5     | 110 | STAT1       | 5         |
| 51 | ID2         | 3,4,5     | 111 | STAT5A      | 6         |
| 52 | IER2        | 6         | 112 | STX4        | 6         |
| 53 | IER3        | 1,6       | 113 | TNF         | 1,4,5     |
| 54 | IL10        | 5         | 114 | TNFAIP3     | 1,3,4,5   |
| 55 | IL12 B      | 5         | 115 | TNIP2       | 6         |
| 56 | IL15RA      | 1,6       | 116 | TPMT        | 6         |
| 57 | IL1B        | 1         | 117 | TRAF1       | 1,4,5     |
| 58 | IL2         | 5         | 118 | VIM         | 1,6       |
| 59 | IL2RA       | 1,6       | 119 | WTAP        | 6         |
| 60 | IL32        | 6         | 120 | ZFP36L1     | 5         |

Ref 1: Shaffer et al., Immunity 2001

Ref 2: Davis et al., J Exp Med 2001

Ref 3: Ngo et al., Nature 2006

Ref 4: Lam et al., Clin Cancer Res 2005

Ref 5: Lam et al., Blood 2008

Ref 6: Feuerhake et al., Blood 2005

**Table S2.** List of NF-kB related genes analyzed

| Gene Symbol (alias)    | Chromosomal location | Reference mRNA | N. of exons | Coding exons | CDS Length | Notes         |
|------------------------|----------------------|----------------|-------------|--------------|------------|---------------|
| BCL10                  | 1p22                 | NM_003921.3    | 4           | Exon 2-4     | 702 bp     |               |
| BIRC2 (ciAP1)          | 11q22                | NM_001166.3    | 9           | Exon 2-9     | 1857 bp    |               |
| BIRC3 (ciAP2)          | 11q22                | NM_001165.3    | 9           | Exon 2-9     | 1815 bp    | variant 1     |
| CARD11                 | 7p22                 | NM_032415.3    | 25          | Exon 2-25    | 3444 bp    |               |
| CD40                   | 20q12-q13.2          | NM_001250.4    | 9           | Exon 1-9     | 834 bp     | variant 1     |
| CHUK (IKK $\alpha$ )   | 10q24-q25            | NM_001278.3    | 21          | Exon 1-21    | 2238 bp    |               |
| CSNK1A1                | 5q32                 | NM_001025105.1 | 11          | Exon 1-11    | 1098 bp    | isoform 1     |
| CYLD                   | 16q12.1              | NM_015247.2    | 20          | Exon 4-20    | 2871 bp    |               |
| IKBKB (IKK $\beta$ )   | 8p11.2               | NM_001556.1    | 22          | Exon 2-22    | 2271 bp    |               |
| IKBKG (NEMO)           | Xq28                 | NM_003639.3    | 10          | Exon 2-10    | 1260 bp    | variant 3     |
| MALT1                  | 18q21                | NM_006785.2    | 17          | Exon 1-17    | 2475 bp    | variant 1     |
| MAP3K14 (NIK)          | 17q21                | NM_003954.2    | 16          | Exon 2-16    | 2844 bp    |               |
| MAP3K7 (TAK1)          | 6q16.1-q16.3         | NM_145331.1    | 17          | Exon 1-17    | 1821 bp    | isoform B     |
| MAP3K7IP2 (TAB2)       | 6q25.1-q25.3         | NM_015093.3    | 7           | Exon 2-7     | 2082 bp    |               |
| MAP3K7IP3 (TAB3)       | Xp21.2               | NM_152787.3    | 11          | Exon 5-11    | 2139 bp    |               |
| NFKB1 (p105/p50)       | 4q24                 | NM_003998.2    | 24          | Exon 2-24    | 2910 bp    |               |
| NFKBIA (IkB $\alpha$ ) | 14q13                | NM_020529.2    | 6           | Exon 1-6     | 954 bp     |               |
| NFKBIB (IkB $\beta$ )  | 19q13.1              | NM_002503.3    | 6           | Exon 1-6     | 1071 bp    | isoform alpha |
| PRKCB1                 | 16p11.2              | NM_002738.5    | 17          | Exon 1-17    | 2022 bp    | variant 2     |
| REL (cREL)             | 2p13-p12             | NM_002908.2    | 11          | Exon 1-11    | 1860 bp    |               |
| RIPK1                  | 6p25.2               | NM_003804.3    | 10          | Exon 1-10    | 2016 bp    |               |
| TNFAIP3 (A20)          | 6q23.3               | NM_006290.2    | 9           | Exon 2-9     | 2373 bp    |               |
| TNFRSF11A (RANK)       | 18q22.1              | NM_003839.2    | 10          | Exon 1-10    | 1851 bp    |               |
| TNFRSF13C (BAFFR)      | 22q13.1-q13.31       | NM_052945.2    | 3           | Exon 1-3     | 555 bp     |               |
| TNFSF13B (BAFF)        | 13q32-34             | NM_006573.3    | 6           | Exon 1-6     | 858 bp     |               |
| TRAF1                  | 9q33-q34             | NM_005658.3    | 8           | Exon 2-8     | 1251 bp    |               |
| TRAF2                  | 9q34                 | NM_021138.3    | 11          | Exon 2-11    | 1506 bp    |               |
| TRAF3                  | 14q32.32             | NM_145725.1    | 12          | Exon 3-12    | 1707 bp    | variant 1     |
| TRAF4                  | 17q11-q12            | NM_004295.3    | 7           | Exon 1-7     | 1413 bp    | variant 1     |
| TRAF5                  | 1q32                 | NM_004619.3    | 11          | Exon 2-11    | 1674 bp    | variant 1     |
| TRAF6                  | 11p12                | NM_145803.1    | 8           | Exon 3-8     | 1569 bp    | variant 1     |

**Table S3.** Unmutated NF- $\kappa$ B pathway genes

| Gene Symbol (alias)             | N of mutated cases/tested (%) |
|---------------------------------|-------------------------------|
| BCL10                           | 0/22 (0%)                     |
| BIRC2 (cIAP1)                   | 0/14 (0%)                     |
| BIRC3 (cIAP2)                   | 0/14 (0%)                     |
| CD40                            | 0/20 (0%)                     |
| CHUK (IKK $\alpha$ )            | 0/14 (0%)                     |
| CSNK1A1                         | 0/24 (0%)                     |
| CYLD                            | 0/14 (0%)                     |
| IKBKB (IKK $\beta$ )            | 0/14 (0%)                     |
| IKBKG (NEMO)                    | 0/14 (0%)                     |
| MALT1                           | 0/14 (0%)                     |
| MAP3K14 (NIK)                   | 0/14 (0%)                     |
| MAP3K7IP2 (TAB2)                | 0/14 (0%)                     |
| MAP3K7IP3 (TAB3)                | 0/24 (0%)                     |
| NFKB1 (p105/p50)                | 0/14 (0%)                     |
| NFKBIA (I $\kappa$ B $\alpha$ ) | 0/14 (0%)                     |
| NFKBIB (I $\kappa$ B $\beta$ )  | 0/22 (0%)                     |
| PRKCB1                          | 0/14 (0%)                     |
| REL (cREL)                      | 0/14 (0%)                     |
| RIPK1                           | 0/23 (0%)                     |
| TNFSF13B (BAFF)                 | 0/14 (0%)                     |
| TNFRSF13C (BAFFR)               | 0/23 (0%)                     |
| TRAF1                           | 0/24 (0%)                     |
| TRAF3                           | 0/14 (0%)                     |
| TRAF4                           | 0/14 (0%)                     |
| TRAF6                           | 0/21 (0%)                     |

**Table S4.** DLBCL samples found mutated in the discovery/validation screening

| Sample ID | Subtype | Status | N of Mutations | Mutated gene   |
|-----------|---------|--------|----------------|----------------|
| Ly3       | ABC     | M      | 2              | CARD11, RANK   |
| SUDHL2    | ABC     | M      | 2              | TNFAIP3        |
| RC-K8*    | ABC     | M      | 4              | TNFAIP3        |
| U2932     | ABC     | M      | 1              | TAK1           |
| 2024      | ABC     | M      | 1              | CARD11         |
| 2025      | ABC     | M      | 2              | TRAF2, RANK    |
| 2026      | ABC     | M      | 1              | RANK           |
| 2033      | ABC     | M      | 1              | TNFAIP3        |
| 2043      | ABC     | M      | 1              | TRAF5          |
| 2044      | ABC     | M      | 2              | TRAF5          |
| 2063      | ABC     | M      | 1              | TNFAIP3        |
| 2072      | ABC     | M      | 1              | RANK           |
| 2091      | ABC     | M      | 1              | CARD11         |
| 2093      | ABC     | M      | 1              | TNFAIP3        |
| 2108      | ABC     | M      | 1              | TNFAIP3        |
| 2152      | ABC     | M      | 1              | CARD11         |
| 2160      | ABC     | M      | 1              | TNFAIP3        |
| 2183      | ABC     | M      | 2              | TNFAIP3, TAK1  |
| 2195      | ABC     | M      | 1              | TNFAIP3        |
| 2027      | GCB     | M      | 1              | TRAF5          |
| 2032      | GCB     | M      | 1              | RANK           |
| 2073      | GCB     | M      | 1              | CARD11         |
| 2082      | GCB     | M      | 1              | TRAF2          |
| 2089      | GCB     | M      | 1              | TNFAIP3        |
| 2144      | GCB     | M      | 1              | TRAF5          |
| SUDHL5    | GCB     | M      | 1              | TRAF2          |
| SUDHL7    | GCB     | M      | 1              | CARD11         |
| WSU       | GCB     | M      | 2              | CARD11, TRAF2  |
| FARAGE    | GCB     | M      | 1              | TRAF2          |
| 2015      | NC      | M      | 2              | TNFAIP3, RANK  |
| 2112      | NC      | M      | 1              | CARD11         |
| 2014      | non-GC  | M      | 1              | TNFAIP3        |
| 2131      | non-GC  | M      | 3              | TNFAIP3, TRAF2 |
| 2151      | non-GC  | M      | 2              | CARD11, RANK   |
| 2186      | non-GC  | M      | 1              | TNFAIP3        |
| 2189      | non-GC  | M      | 1              | TRAF5          |

\*This cell line also carries biallelic inactivating mutations in the NFKBIA gene

**Table S5.** Biallelic inactivation of the *A20* gene in DLBCL

| Sample  | DLBCL subtype | Structural alterations |           | Mutation <sup>^</sup> | Location | Predicted functional consequences       |
|---------|---------------|------------------------|-----------|-----------------------|----------|-----------------------------------------|
|         |               | Allele                 | Status    |                       |          |                                         |
| SUDHL2  | ABC           | A                      | Mutated   | C613T (R183X)         | Exon 4   | truncated protein of 182 aa             |
|         |               | B                      | Mutated   | C1442A (S459X)        | Exon 7   | truncated protein of 458 aa             |
| RCK8    | ABC           | A                      | Mutated   | G(+1)A                | Intron2  | frameshift; truncated protein of 99 aa  |
|         |               | B                      | Mutated   | ΔT2227                | Exon 9   | frameshift; truncated protein of 720 aa |
| 2186    | non-GC        | A                      | Mutated   | C613T (183R>X)        | Exon 4   | truncated protein of 182 aa             |
|         |               | B                      | Mutated   | +A (351-352)          | Exon 2   | frameshift; truncated protein of 95 aa  |
| 2131    | non-GC        | A                      | Mutated   | ΔC340                 | Exon 2   | frameshift; truncated protein of 91 aa  |
|         |               | B                      | Mutated   | + GTAAA [1883_1884]   | Exon 7   | frameshift; truncated protein of 606 aa |
| 2093    | ABC           | A                      | Mutated   | +A [557_558]          | Exon 4   | frameshift; truncated protein of 163 aa |
|         |               | B                      | Deleted   |                       |          |                                         |
| 2033    | ABC           | A                      | Mutated   | C1534T (Q490X)        | Exon 7   | truncated protein of 489 aa             |
|         |               | B                      | Deleted   |                       |          |                                         |
| 2063    | ABC           | A                      | Mutated   | C228A (C54X)          | Exon 2   | truncated protein of 53 aa              |
|         |               | B                      | Deleted   |                       |          |                                         |
| 2108    | ABC           | A                      | Mutated   | +G [550_551]          | Exon 3   | frameshift; truncated protein of 162 aa |
|         |               | B                      | Deleted   |                       |          |                                         |
| 2015    | NC            | A                      | Mutated   | G1060T (E332X)        | Exon 7   | truncated protein of 331 aa             |
|         |               | B                      | Deleted   |                       |          |                                         |
| I07-216 | GC            | A                      | Mutated   | ΔAT [586-587]         | Exon 4   | frameshift; truncated protein of 173 aa |
|         |               | B                      | Deleted   |                       |          |                                         |
| 2195    | ABC           | A                      | Mutated   | ΔAG465_466            | Exon 2   | frameshift; truncated protein of 133 aa |
|         |               | B                      | Deleted** |                       |          |                                         |
| 2036    | non-GC*       | A                      | Mutated   | G1053A (splice site)  | Exon 7   | aberrant splicing                       |
|         |               | B                      | Deleted   |                       |          |                                         |
| I07-212 | non-GC*       | A                      | Mutated   | Δ10bp [1376-1385]     | Exon 7   | frameshift; truncated protein of 436 aa |
|         |               | B                      | Deleted   |                       |          |                                         |
| 2176    | non-GC        | A                      | Mutated   | G1133A (W356X)        | Exon 7   | truncated protein of 355 aa             |
|         |               | B                      | Deleted** |                       |          |                                         |
| 2183    | ABC           | A                      | Mutated   | Δ16bp [814-829]       | Exon 5   | truncated protein of 250 aa             |
|         |               | B                      | Deleted   |                       |          |                                         |

|      |         |        |                    |                          |        |                                         |
|------|---------|--------|--------------------|--------------------------|--------|-----------------------------------------|
| 2089 | GCB     | A<br>B | Mutated<br>Deleted | G73T (E3X); G118C (A18P) | Exon 2 | truncated protein of 2 aa               |
| 2014 | non-GC  | A<br>B | Mutated<br>Normal  | G1420T (E452X)<br>-      | Exon 7 | truncated protein of 451 aa             |
| 2156 | non-GC* | A<br>B | Mutated<br>Normal  | G2047T (E661X)<br>-      | Exon 8 | truncated protein of 660 aa             |
| 2160 | ABC     | A<br>B | Mutated<br>nd      | C613T (183R>X)           | Exon 4 | truncated protein of 182 aa             |
| 2149 | non-GC  | A<br>B | Mutated<br>nd      | +C [2340_2341]           | Exon 9 | frameshift; truncated protein of 758 aa |
| 2188 | non-GC  | A<br>B | Mutated<br>nd      | ΔAG [465_466]            | Exon 2 | frameshift; truncated protein of 133 aa |
| 2161 | non-GC  | A<br>B | Mutated<br>nd      | G321A (W85X)             | Exon 2 | truncated protein of 84 aa              |

---

^Numbering according to GenBank accession No. NM\_006290.2 (nucleotide changes) and NP\_006281.1 (amino acid changes, in brackets)

\*\* as assessed by sequencing analysis of genomic DNA

Abbreviations: aa, amino acid; Δ, deletion; +, insertion; nd, not determined

ABC, activated B cell type; GCB, germinal center B cell type; NC, unclassified; non-GC, non germinal center type (IHC-based classification)

non-GC\* denotes cases coexpressing CD10 and MUM1



**Table S6.** SNP array analysis of DLBCL cases carrying deletions (<6Mb) involving *TNFAIP3* (A20)

| Sample ID | Aberration          | Cytoband        | Start position <sup>^</sup> | End position <sup>^</sup> | Length (Mb) | Annotated genes in region <sup>^^</sup> | Array    |
|-----------|---------------------|-----------------|-----------------------------|---------------------------|-------------|-----------------------------------------|----------|
| 2030      | Hemizygous Deletion | 6q23.3          | 137114313                   | 138543999                 | 1.43        | TNFAIP3 and 9 other genes               | SNP 6.0  |
| 2093      | Hemizygous Deletion | 6q23.3          | 137475615                   | 138388944                 | 0.91        | TNFAIP3, OLIG3, IL22RA2, IFNGR1         | SNP 6.0  |
| 2101      | Hemizygous Deletion | 6q23.3          | 136761774                   | 138406359                 | 1.64        | TNFAIP3 and 8 other genes               | SNP 6.0  |
| 2110*     | Homozygous Deletion | 6q23.3          | 137651612                   | 138335112                 | 0.68        | TNFAIP3, OLIG3                          | SNP 6.0  |
| 2127*     | Homozygous Deletion | 6q23.3          | 137444914                   | 138522109                 | 1.08        | TNFAIP3, OLIG3, PERP, IL22RA2, IFNGR1   | SNP 6.0  |
| 2165      | Hemizygous Deletion | 6q23.2-6q24.1   | 135195324                   | 141099925                 | 5.90        | TNFAIP3 and 26 other genes              | SNP 6.0  |
| 2170*     | Homozygous Deletion | 6q23.3-6q24.1   | 137398912                   | 143038752                 | 5.64        | TNFAIP3 and 18 other genes              | SNP 6.0  |
| 05-292*   | Homozygous Deletion | 6q23.3          | 138140569                   | 138501502                 | 0.36        | TNFAIP3, PERP                           | 250K Nsp |
| 07-208    | Hemizygous Deletion | 6q23.2 - 6q24.1 | 134406736                   | 139940965                 | 5.53        | TNFAIP3 and 28 other genes              | 250K Nsp |

\*In these cases, the interval refers to the homozygously deleted region

<sup>^</sup> Numbering according to NCBI Build 36.1

<sup>^^</sup> According to the NCBI RefSeq Database

**Table S7.** Copy number analysis of *A20* in DLBCL

| Sample ID | Mutation Status | <i>TNFAIP3(A20)</i> locus | % cells with deletion | % tumor cells in the biopsy <sup>^</sup> | Method                                                 |
|-----------|-----------------|---------------------------|-----------------------|------------------------------------------|--------------------------------------------------------|
| 2015      | M               | Hemizygous Deletion       | 30-40%                | 40%                                      | FISH; Affymetrix 6.0 SNP array                         |
| 2033      | M               | Hemizygous Deletion       | 80%                   | 60-80%                                   | FISH; Affymetrix 6.0 SNP array                         |
| 2036      | M               | Hemizygous Deletion       | 30%                   | 40%                                      | FISH; Affymetrix 6.0 SNP array                         |
| 2063      | M               | Hemizygous Deletion       | 80%                   | 80%                                      | FISH; Affymetrix 6.0 SNP array                         |
| 2089      | M               | Hemizygous Deletion       | 70%                   | 80%                                      | FISH; Affymetrix 6.0 SNP array                         |
| 2093      | M               | Hemizygous Deletion       | 40%                   | 50%                                      | FISH; Affymetrix 6.0 SNP array                         |
| 2108      | M               | Hemizygous Deletion       | 50%                   | 50%                                      | FISH                                                   |
| 2176      | M               | Hemizygous Deletion       | >95%                  | >95%                                     | PCR amplification and direct sequencing                |
| 2183      | M               | Hemizygous Deletion       | 30-50%                | 60-80%                                   | FISH                                                   |
| 2195      | M               | Hemizygous Deletion       | >95%                  | >95%                                     | PCR amplification and direct sequencing                |
| 07-212    | M               | Hemizygous Deletion       | na                    | >80%                                     | 250K Nsp SNP array                                     |
| 07-216    | M               | Hemizygous Deletion       | na                    | >80%                                     | 250K Nsp SNP array                                     |
| 2014      | M               | Normal                    | 0                     | 30%                                      | FISH                                                   |
| 2156      | M               | Normal                    | 0                     | nd                                       | FISH                                                   |
| 2053      | na              | Homozygous Deletion       | 95%                   | 90%                                      | FISH                                                   |
| 2069      | na              | Homozygous Deletion       | 80%                   | 80%                                      | FISH                                                   |
| 2110      | na              | Homozygous Deletion       | na                    | 40%                                      | Affymetrix 6.0 SNP array                               |
| 2170      | na              | Homozygous Deletion       | na                    | >80%                                     | Affymetrix 6.0 SNP array                               |
| 2127      | na              | Homozygous Deletion       | na                    | >80%                                     | Affymetrix 6.0 SNP array                               |
| 05-292    | na              | Homozygous Deletion       | na                    | >80%                                     | 250K Nsp SNP array                                     |
| 07-215    | na              | Homozygous Deletion       | na                    | >80%                                     | 250K Nsp SNP array                                     |
| 2026      | WT              | Hemizygous Deletion       | 65%                   | 70%                                      | FISH                                                   |
| 2035      | WT              | Hemizygous Deletion       | 50%                   | 40%                                      | FISH                                                   |
| 2040      | WT              | Hemizygous Deletion       | 30-50%                | 60%                                      | FISH                                                   |
| 2059      | WT              | Hemizygous Deletion       | 50-70%                | 60%                                      | FISH                                                   |
| 2064      | WT              | Hemizygous Deletion       | 23%                   | 20%                                      | FISH                                                   |
| 2088      | WT              | Hemizygous Deletion       | 50%                   | 50%                                      | FISH                                                   |
| 2102      | WT              | Hemizygous Deletion       | 25%                   | 30%                                      | FISH                                                   |
| 2112      | WT              | Hemizygous Deletion       | 30-40%                | 50%                                      | FISH                                                   |
| 2116      | WT              | Hemizygous Deletion       | 20%                   | 20%                                      | FISH                                                   |
| 2185      | WT              | Hemizygous Deletion       | 50%                   | 60%                                      | FISH                                                   |
| 2019      | WT              | Hemizygous Deletion       | 50%                   | 50%                                      | FISH; Affymetrix 6.0 SNP array                         |
| 2034      | WT              | Hemizygous Deletion       | 40%                   | 90%                                      | FISH; Affymetrix 6.0 SNP array                         |
| 2046      | WT              | Hemizygous Deletion       | 30-50%                | 30-80%                                   | FISH; Affymetrix 6.0 SNP array                         |
| 2062      | WT              | Hemizygous Deletion       | 50%                   | 70-80%                                   | FISH; Affymetrix 6.0 SNP array                         |
| 2101      | WT              | Hemizygous Deletion       | 50%                   | 50%                                      | FISH; Affymetrix 6.0 SNP array                         |
| 2017      | WT              | Hemizygous Deletion       | na                    | >80%                                     | Affymetrix 6.0 SNP array                               |
| 2161      | WT              | Hemizygous Deletion       | na                    | >80%                                     | Affymetrix 6.0 SNP array                               |
| 2165      | WT              | Hemizygous Deletion       | na                    | >80%                                     | Affymetrix 6.0 SNP array                               |
| 2171      | WT              | Hemizygous Deletion       | na                    | >80%                                     | Affymetrix 6.0 SNP array                               |
| 2179      | WT              | Hemizygous Deletion       | na                    | >80%                                     | Affymetrix 6.0 SNP array                               |
| 2182      | WT              | Hemizygous Deletion       | na                    | >80%                                     | Affymetrix 6.0 SNP array                               |
| Ly10      | WT              | Hemizygous Deletion       | 100%                  | 100%                                     | FISH                                                   |
| Ly3       | WT              | Hemizygous Deletion       | 100%                  | 100%                                     | FISH                                                   |
| RIVA      | WT              | Hemizygous Deletion       | 100%                  | 100%                                     | FISH                                                   |
| U9232     | WT              | Hemizygous Deletion       | 100%                  | 100%                                     | FISH                                                   |
| 2096      | WT              | Monosomy 6                | 70%                   | 80%                                      | FISH                                                   |
| 2131      | M/M             | Normal                    | na                    | <50%                                     | RT-PCR amplification and sequencing of cloned products |
| 2186      | M/M             | Normal                    | na                    | >90%                                     | RT-PCR amplification and sequencing of cloned products |
| RCK8      | M/M             | Normal                    | na                    | 100%                                     | RT-PCR amplification and sequencing of cloned products |
| SUDHL2    | M/M             | Normal                    | na                    | 100%                                     | RT-PCR amplification and sequencing of cloned products |

M, mutated; M/M, biallelically mutated; WT, wild-type

na, not applicable (cases studied by SNP array analysis); nd, not determined

<sup>^</sup> as assessed by morphologic and histologic analysis of serial tissue sections

**Table S8.** Missense mutations affecting NF- $\kappa$ B pathway components in DLBCL

| Gene (alias)     | Role in NF- $\kappa$ B pathway                                             | Sample ID | Exon | Nucleotide change* | AA change**        | Affected protein domain                        |
|------------------|----------------------------------------------------------------------------|-----------|------|--------------------|--------------------|------------------------------------------------|
| CARD11           | adaptor protein/signaling intermediate required for IKK complex activation | 2091      | 3    | G550A              | Cys 49 Tyr         | CARD domain                                    |
|                  |                                                                            | 2058      | 5    | G771A              | Gly123 Ser         | proximity of coiled-coil domain 1              |
|                  |                                                                            | 2112^     | 5    | C787T              | Thr 128 Met        | proximity of coiled-coil domain 1              |
|                  |                                                                            | SUDHL7    | 5    | C787T              | Thr 128 Met        | proximity of coiled-coil domain 1              |
|                  |                                                                            | 2024      | 6    | G1092A             | Asp 230 Asn        | coiled-coil domain 1                           |
|                  |                                                                            | 2151      | 6    | A1135C             | Lys 244 Thr        | coiled-coil domain 1                           |
|                  |                                                                            | OCI-Ly3   | 6    | T1156 (+/+)        | Leu 251 Pro        | coiled-coil domain 1                           |
|                  |                                                                            | WSU       | 8    | A1474T             | Asp 357 Val        | coiled-coil domain 4                           |
|                  |                                                                            | 2073^     | 8    | T1498A             | Met 365 Lys        | coiled-coil domain 4                           |
|                  |                                                                            | 2152      | 9    | C1671T             | Arg 423 Trp        | coiled-coil domain 4                           |
| TRAF2            | adaptor protein/signal transducer for CD40 and TNF-R                       | 2025^     | 6    | C614G              | Pro 186 Arg        | Zinc finger-TRAF domain                        |
|                  |                                                                            | 2082      | 3    | C269T              | Ala 71 Val         | RING domain (protein-protein interaction)      |
|                  |                                                                            | 2131      | 5    | C527T              | Pro 157 Leu        | -                                              |
|                  |                                                                            | SUDHL5    | 6    | A640G              | Lys 195 Glu        | Zinc finger-TRAF domain (receptor association) |
|                  |                                                                            | FARAGE    | 8    | G895T              | Ala 280 Ser        | TRAF-n domain (self association)               |
|                  |                                                                            | WSU       | 9    | C1150T             | Arg 365 Cys        | MATH domain (adaptor domain)                   |
| TRAF5            | adaptor protein/signal transducer for CD40, CD30 and LT-beta               | 2044^     | 7    | G717 T             | Glu 219 Asp        | Zinc finger-TRAF domain                        |
|                  |                                                                            | 2044^     | 8    | $\Delta$ A 846     | $\Delta$ AA299-557 | MATH domain (adaptor domain)                   |
|                  |                                                                            | 2027      | 2    | C247T              | Arg 63 Cys         | RING domain (protein-protein interaction)      |
|                  |                                                                            | 2144      | 7    | C659T              | Ala 200 Val        | Zinc finger-TRAF domain                        |
|                  |                                                                            | 2043      | 11   | C1214A             | Ala 385 Glu        | MATH domain (interaction domain)               |
|                  |                                                                            | 2189      | 11   | G1666A             | Ala 536 Thr        | MATH domain (interaction domain)               |
| MAP3K7 (TAK1)    | serine-threonine kinase required for IKKB phosphorylation/activation       | 2183      | 1    | T184G              | Ser 8 Ala          | Tyrosine protein kinase domain                 |
|                  |                                                                            | U2932     | 12   | T1411G             | Ser 417 Ala        | -                                              |
| TNFRSF11A (RANK) | cell surface receptor                                                      | 2025^     | 10   | C1810T             | Pro 591 Leu        | -                                              |
|                  |                                                                            | 2032      | 4    | G400T              | Ser 121 Ile        | Extracellular domain                           |
|                  |                                                                            | 2026      | 5    | C515A              | Phe 159 Leu        | TNFR_c6 (extracellular domain)                 |
|                  |                                                                            | 2015      | 7    | A756G              | Lys 240 Glu        | Intracellular domain                           |
|                  |                                                                            | 2072      | 7    | A756G              | Lys 240 Glu        | Intracellular domain                           |
|                  |                                                                            | 2151      | 7    | A756G              | Lys 240 Glu        | Intracellular domain                           |
|                  |                                                                            | OCI-Ly10  | 4    | G388A^^            | Gly 117 Glu        | Extracellular domain                           |

\*, \*\* Numbering according to the corresponding mRNA and protein Reference Sequence, respectively

^Paired normal DNA was available for these samples and confirmed the somatic origin of the mutation

^^Mutation detected in a minority of the tumor population

+/, homozygous or hemizygous change;  $\Delta$ , deletion; AA, aminoacid

**Table S9.** Oligonucleotides used for genomic amplification of the NF- $\kappa$ B-related genes found mutated in DLBCL

| Gene Symbol (alias) | Genomic Region  | Primer name | Position <sup>^</sup>      | Oligonucleotide Sequence     | Reference mRNA |
|---------------------|-----------------|-------------|----------------------------|------------------------------|----------------|
| TNFAIP3(A20)        | Exon 2          | A20-E2F     | -145                       | 5'-ccgggagtagagggtctaa-3'    | NM_006290.2    |
|                     |                 | A20-E2R     | +167                       | 5'-gtctgtattatcacatacccc-3'  | NM_006290.2    |
|                     | Exon 3          | A20-E3F     | -149                       | 5'-tcagtttgcoccttgactagga-3' | NM_006290.2    |
|                     |                 | A20-E3R     | +159                       | 5'-tgagtcccaactggaggtttc-3'  | NM_006290.2    |
|                     | Exon 4/Exon 5   | A20-E4F     | -216                       | 5'-ctccccaacttttgagttgc-3'   | NM_006290.2    |
|                     |                 | A20-E5R     | +136                       | 5'-aaccaagcaagtcacagaacaa-3' | NM_006290.2    |
|                     | Exon 6          | A20-E6F     | -220                       | 5'-cacctccaggctggtaatg-3'    | NM_006290.2    |
|                     |                 | A20-E6R     | +200                       | 5'-tgtttgattgaaacccaagt-3'   | NM_006290.2    |
|                     | Exon 7          | A20-E7F     | -168                       | 5'-gttgctgtaaaagtgtgagc-3'   | NM_006290.2    |
|                     |                 | A20-E7R     | +190                       | 5'-cagtgctttgctccat-3'       | NM_006290.2    |
|                     | Exon 8          | A20-E8F     | -206                       | 5'-gattgtaaaagccaagatgtt-3'  | NM_006290.2    |
|                     |                 | A20-E8R     | +191                       | 5'-ggaggtagcatttccgacc-3'    | NM_006290.2    |
|                     | Exon 9          | A20-E9F     | -237                       | 5'-gcttggcggtttccctcag-3'    | NM_006290.2    |
|                     |                 | A20-E9R     | 2645*                      | 5'-ctttgcttctaaggccacct-3'   | NM_006290.2    |
| TNFRSF11A (RANK)    | Exon 1          | RANK_E1F    | -141                       | 5'-gagctgggaccaccctg-3'      | NM_003839.2    |
|                     |                 | RANK_E1R    | +316                       | 5'-ggtgctcaagaagcatttgg-3'   | NM_003839.2    |
|                     | Exon 2          | RANK_E2F    | -182                       | 5'-gaggtagaggttgcggtgaa-3'   | NM_003839.2    |
|                     |                 | RANK_E2R    | +121                       | 5'-cacctgccactaccataacg-3'   | NM_003839.2    |
|                     | Exon 3          | RANK_E3F    | -176                       | 5'-actgcattgtggcctctct-3'    | NM_003839.2    |
|                     |                 | RANK_E3R    | +147                       | 5'-aacgcatcttcttgggatg-3'    | NM_003839.2    |
|                     | Exon 4          | RANK_E4F    | -171                       | 5'-gaagtgcgaggaggaactg-3'    | NM_003839.2    |
|                     |                 | RANK_E4R    | +206                       | 5'-tgaagaacctagccgagga-3'    | NM_003839.2    |
|                     | Exon 5          | RANK_E5F    | -176                       | 5'-cctgtgggagctgagaagt-3'    | NM_003839.2    |
|                     |                 | RANK_E5R    | +252                       | 5'-agctgcaaccgtaagtcaca-3'   | NM_003839.2    |
|                     | Exon 6          | RANK_E6F    | -211                       | 5'-agagaacacaggcagcgtt-3'    | NM_003839.2    |
|                     |                 | RANK_E6R    | +206                       | 5'-cccccaatccagttagaaa-3'    | NM_003839.2    |
|                     | Exon 7          | RANK_E7F    | -175                       | 5'-acccttggaaatgtgagtg-3'    | NM_003839.2    |
|                     |                 | RANK_E7R    | +244                       | 5'-caagtcacccgttctggaac-3'   | NM_003839.2    |
|                     | Exon 8          | RANK_E8F    | -203                       | 5'-ggatcttggccacacacacat-3'  | NM_003839.2    |
|                     |                 | RANK_E8R1   | +65                        | 5'-ggatggctctaccagcctaa-3'   | NM_003839.2    |
|                     | Exon 9          | RANK_E9F    | -121                       | 5'-ccatctgtactgttgggga-3'    | NM_003839.2    |
|                     |                 | RANK_E9R    | +101                       | 5'-cccattagcttccctcc-3'      | NM_003839.2    |
|                     | Exon 10         | RANK_E10F   | -75                        | 5'-gaacctctctcggcagac-3'     | NM_003839.2    |
|                     |                 | RANK_E10R   | 2058*                      | 5'-cacttctgaaaagccatt-3'     | NM_003839.2    |
| CARD11              | Exon 3          | CARMA1_E3F  | -73                        | 5'-cactccagaggagttagagagc-3' | NM_032415.3    |
|                     |                 | CARMA1_E3R  | +120                       | 5'-ccccagtttaaaatccctga-3'   | NM_032415.3    |
|                     | Exon 4          | CARMA1_E4F  | -157                       | 5'-catctgggctccaagatacaa-3'  | NM_032415.3    |
|                     |                 | CARMA1_E4R  | +157                       | 5'-gtggttgacagaccagtt-3'     | NM_032415.3    |
|                     | Exon 5          | CARMA1_E5F  | -90                        | 5'-tgagtgaatgaatggcacc-3'    | NM_032415.3    |
|                     |                 | CARMA1_E5R  | +86                        | 5'-gcacctgttatgggagaa-3'     | NM_032415.3    |
|                     | Exon 6          | CARMA1_E6F  | -153                       | 5'-ggtttcttggagccctctc-3'    | NM_032415.3    |
|                     |                 | CARMA1_E6R  | +128                       | 5'-atgcctgtgatcctgcagtc-3'   | NM_032415.3    |
|                     | Exon 7/Exon 8   | CARMA1_E7F  | -100                       | 5'-tgtcctatctgttctgtgt-3'    | NM_032415.3    |
|                     |                 | CARMA1_E8R  | +141                       | 5'-tgggaaagatgattcagga-3'    | NM_032415.3    |
|                     | Exon 9          | CARMA1_E9F2 | -181                       | 5'-ggctctgtgatcgcttaag-3'    | NM_032415.3    |
|                     |                 | CARMA1_E9R2 | +105                       | 5'-cttcagggtgggtctcca-3'     | NM_032415.3    |
|                     | Exon 10         | CARMA1_E10F | -97                        | 5'-gccgaggaatgatgatg-3'      | NM_032415.3    |
|                     |                 | CARMA1_E10R | +180                       | 5'-taagaagcagatcgcaggat-3'   | NM_032415.3    |
|                     | Exon 11         | CARMA1_E11F | -123                       | 5'-cgtatgacgagggacacgat-3'   | NM_032415.3    |
|                     |                 | CARMA1_E11R | +283                       | 5'-cagttcagctaacgcaccag-3'   | NM_032415.3    |
|                     | Exon 12         | CARMA1_E12F | -261                       | 5'-ggaggttttgagggctct-3'     | NM_032415.3    |
|                     |                 | CARMA1_E12R | +110                       | 5'-tgagctctggaggagagtg-3'    | NM_032415.3    |
|                     | Exon 13         | CARMA1_E13F | -157                       | 5'-gctcagcacaagcctctc-3'     | NM_032415.3    |
|                     |                 | CARMA1_E13R | +204                       | 5'-acaggcagctgggtgaac-3'     | NM_032415.3    |
|                     | Exon 14         | CARMA1_E14F | -158                       | 5'-cttctgtcccaacctct-3'      | NM_032415.3    |
|                     |                 | CARMA1_E14R | +246                       | 5'-agacctagctcgcacctct-3'    | NM_032415.3    |
|                     | Exon 15         | CARMA1_E15F | -160                       | 5'-gggaacctcagagaccatc-3'    | NM_032415.3    |
|                     |                 | CARMA1_E15R | +161                       | 5'-ccagccaggaagtattct-3'     | NM_032415.3    |
|                     | Exon 16/Exon 17 | CARMA1_E16F | -67                        | 5'-tgttcccagtagggcttt-3'     | NM_032415.3    |
|                     |                 | CARMA1_E17R | +184                       | 5'-ctgttgcctcctgtgt-3'       | NM_032415.3    |
|                     | Exon 18/Exon 19 | CARMA1_E18F | -113                       | 5'-agagcagcatattgcacagg-3'   | NM_032415.3    |
|                     |                 | CARMA1_E19R | +74                        | 5'-agaccgggagttagtttg-3'     | NM_032415.3    |
|                     | Exon 20         | CARMA1_E20F | -189                       | 5'-caggactcctcccctacc-3'     | NM_032415.3    |
|                     |                 | CARMA1_E20R | +167                       | 5'-gagaggataaaacgggacagg-3'  | NM_032415.3    |
|                     | Exon 21         | CARMA1_E21F | -155                       | 5'-cctgctttataggggaaatga-3'  | NM_032415.3    |
|                     |                 | CARMA1_E21R | +120                       | 5'-tctctcccttggaggact-3'     | NM_032415.3    |
|                     | Exon 22         | CARMA1_E22F | -105                       | 5'-tcacactgacgtggcttc-3'     | NM_032415.3    |
| CARMA1_E22R         |                 | +82         | 5'-ggaggagggaagagaagg-3'   | NM_032415.3                  |                |
| Exon 23             | CARMA1_E23F     | -175        | 5'-ccctcaaggagcttcacagt-3' | NM_032415.3                  |                |
|                     | CARMA1_E23R     | +50         | 5'-atcatcaggggtctctg-3'    | NM_032415.3                  |                |

|               |                 |               |                                 |                               |             |
|---------------|-----------------|---------------|---------------------------------|-------------------------------|-------------|
|               | Exon 24         | CARMA1_E24F   | -208                            | 5'-tctctgcccatgaacatcac-3'    | NM_032415.3 |
|               |                 | CARMA1_E24R   | +150                            | 5'-catcagctctcgaaggtcag-3'    | NM_032415.3 |
|               | Exon 25         | CARMA1_E25F   | -141                            | 5'-ttaagaggcacggacgctat-3'    | NM_032415.3 |
|               |                 | CARMA1_E25R   | +80                             | 5'-ctaagctcactgggcatggt-3'    | NM_032415.3 |
| TRAF5         | Exon 2/Exon 3   | TRAF5_E2/3F   | -69                             | 5'-catctgatggctgtgtgtt-3'     | NM_004619.3 |
|               |                 | TRAF5_E2/3R   | +115                            | 5'-ggactccaaggaaggtctcc-3'    | NM_004619.3 |
|               | Exon 4          | TRAF5_E4F     | -131                            | 5'-tccattccagctgatgtctg-3'    | NM_004619.3 |
|               |                 | TRAF5_E4R     | +171                            | 5'-cgtagggtggctacagcact-3'    | NM_004619.3 |
|               | Exon 5/Exon 7   | TRAF5_E5-7F   | -73                             | 5'-taggcctccagctgacttc-3'     | NM_004619.3 |
|               |                 | TRAF5_E5-7R   | +89                             | 5'-ccatcctcgatggaacagag-3'    | NM_004619.3 |
|               | Exon 8          | TRAF5_E8F     | -148                            | 5'-ttcctgcaacccactagag-3'     | NM_004619.3 |
|               |                 | TRAF5_E8R     | +187                            | 5'-tctaaggcaccctccaat-3'      | NM_004619.3 |
|               | Exon 9          | TRAF5_E9F1    | -195                            | 5'-atgtggcttttggaaaccac-3'    | NM_004619.3 |
|               |                 | TRAF5_E9R1    | +164                            | 5'-catgagtgaatcagggtgga-3'    | NM_004619.3 |
|               | Exon 10/Exon 11 | TRAF5_E10/11F | -130                            | 5'-tggcctgtattttcattctg-3'    | NM_004619.3 |
|               |                 | TRAF5_E10/11R | 1359*                           | 5'-gaaggactggctgaagatgg-3'    | NM_004619.3 |
|               | Exon 11-I       | TRAF5_E11F    | 1244*                           | 5'-aactgctggagggtacttgc-3'    | NM_004619.3 |
|               |                 | TRAF5_E11R    | 2454*                           | 5'-gggtgaaacctacaataatctga-3' | NM_004619.3 |
| TRAF2         | Exon 2/Exon 3   | TRAF2_E2-3F   | -88                             | 5'-atcgctgctactgatcacc-3'     | NM_021138.3 |
|               |                 | TRAF2_E2-3R   | +140                            | 5'-actcaagcaatcccctacc-3'     | NM_021138.3 |
|               | Exon 4          | TRAF2_E4F2    | -109                            | 5'-aaaggcagtgacgcagattg-3'    | NM_021138.3 |
|               |                 | TRAF2_E4R2    | +132                            | 5'-ctccacagacatcagacaggct-3'  | NM_021138.3 |
|               | Exon 5          | TRAF2_E5F     | -156                            | 5'-ctgtgggagccctgagag-3'      | NM_021138.3 |
|               |                 | TRAF2_E5R     | +109                            | 5'-ggtggaacgagtgcaaagg-3'     | NM_021138.3 |
|               | Exon 6          | TRAF2_E6F     | -190                            | 5'-taagatctccgaggtcctcg-3'    | NM_021138.3 |
|               |                 | TRAF2_E6R     | +145                            | 5'-tccatgacccaacgttacag-3'    | NM_021138.3 |
|               | Exon 7          | TRAF2_E7F     | -145                            | 5'-ggctgttgggttcattcag-3'     | NM_021138.3 |
|               |                 | TRAF2_E7R     | +161                            | 5'-agaccaagctgggaacactc-3'    | NM_021138.3 |
|               | Exon 8/Exon 9   | TRAF2_E8/9F   | -115                            | 5'-tctatgacctggcctgtct-3'     | NM_021138.3 |
|               |                 | TRAF2_E8/9R   | +92                             | 5'-cttgggagccatcctatgtg-3'    | NM_021138.3 |
|               | Exon 10         | TRAF2_E10F    | -134                            | 5'-ttttcttgaccaccagaac-3'     | NM_021138.3 |
|               |                 | TRAF2_E10R    | +209                            | 5'-acggaccagtgctcagaat-3'     | NM_021138.3 |
| Exon 11       | TRAF2_E11F      | -81           | 5'-cctgccagtgccagacc-3'         | NM_021138.3                   |             |
|               | TRAF2_E11R      | +96           | 5'-gaggggtctgtgagaggaga-3'      | NM_021138.3                   |             |
| MAP3K7 (TAK1) | Exon 1          | TAK1-F2       | -86                             | 5'-ctgaggccctgtaataaagg-3'    | NM_145331.1 |
|               |                 | TAK1-R2       | +839                            | 5'-gtgcggtatcggagaattg-3'     | NM_145331.1 |
|               | Exon 2          | TAK1-E2F2     | -159                            | 5'-tgttcagtggaatccaga-3'      | NM_145331.1 |
|               |                 | TAK1-E2R2     | +258                            | 5'-tgaattccatggatgaaactgt-3'  | NM_145331.1 |
|               | Exon 3          | TAK1-E3F      | -394                            | 5'-tagcatgacgtctgttgg-3'      | NM_145331.1 |
|               |                 | TAK1-E3R      | +268                            | 5'-atgccacggtgctgtattct-3'    | NM_145331.1 |
|               | Exon 4          | TAK1-E4F      | -59                             | 5'-caaaggccctaagatgatgg-3'    | NM_145331.1 |
|               |                 | TAK1-E4R      | +618                            | 5'-atgatgaacacatcggcagt-3'    | NM_145331.1 |
|               | Exon 5          | TAK1-E5F      | -131                            | 5'-aagcaggactgatggagcat-3'    | NM_145331.1 |
|               |                 | TAK1-E5R      | +349                            | 5'-gcaagaaaaacgtcagacct-3'    | NM_145331.1 |
|               | Exon 6          | TAK1-E6F      | -357                            | 5'-actccatttcaggataccg-3'     | NM_145331.1 |
|               |                 | TAK1-E6R      | +218                            | 5'-tgggatcaactgtacatgttaga-3' | NM_145331.1 |
|               | Exon 7          | TAK1-E7F      | -281                            | 5'-tcaagtctgtgctctgtat-3'     | NM_145331.1 |
|               |                 | TAK1-E7R      | +233                            | 5'-agccagtgaaacatcctcagc-3'   | NM_145331.1 |
|               | Exon 8          | TAK1-E8F      | -267                            | 5'-tgttgagactgttcagcattg-3'   | NM_145331.1 |
|               |                 | TAK1-E8R      | +176                            | 5'-ttccctctgaaatgttccct-3'    | NM_145331.1 |
|               | Exon 9          | TAK1-E9F      | -237                            | 5'-gagaaatattgctgttttcaa-3'   | NM_145331.1 |
| TAK1-E9R      |                 | +207          | 5'-gactggaagcaggtcttcaat-3'     | NM_145331.1                   |             |
| Exon 10       | TAK1-E10F       | -203          | 5'-ttaggcatctgttccctttt-3'      | NM_145331.1                   |             |
|               | TAK1-E10R       | +225          | 5'-gggatttagaattggcaaagg-3'     | NM_145331.1                   |             |
| Exon 11       | TAK1-E11F       | -157          | 5'-ttaccctctgatccctctc-3'       | NM_145331.1                   |             |
|               | TAK1-E11R       | +318          | 5'-ctgtgtttggcagaattcaa-3'      | NM_145331.1                   |             |
| Exon 12       | TAK1-E12F       | -262          | 5'-cctgcagctttgtctgttc-3'       | NM_145331.1                   |             |
|               | TAK1-E12R       | +247          | 5'-ggtgttctcccttcccaaaa-3'      | NM_145331.1                   |             |
| Exon 13       | TAK1-E13F       | -231          | 5'-tgtttaggcccagcaactttt-3'     | NM_145331.1                   |             |
|               | TAK1-E13R       | +248          | 5'-cagcgctaatagaacaattact-3'    | NM_145331.1                   |             |
| Exon 14       | TAK1-E14F       | -204          | 5'-tctgcaagctcatcagtttt-3'      | NM_145331.1                   |             |
|               | TAK1-E14R       | +278          | 5'-gaattcaatacgcctcgaac-3'      | NM_145331.1                   |             |
| Exon 15       | TAK1-E15F       | -254          | 5'-ttgtttctattcagttatagccaac-3' | NM_145331.1                   |             |
|               | TAK1-E15R       | +227          | 5'-tggaggatttaagatgactgaa-3'    | NM_145331.1                   |             |
| Exon 16       | TAK1-E16F       | -269          | 5'-tgcagcctgaaatgcatacc-3'      | NM_145331.1                   |             |
|               | TAK1-E16R       | +175          | 5'-tcaaaaggattgagtttgcac-3'     | NM_145331.1                   |             |
| Exon 17       | TAK1-E17F       | -76           | 5'-aattgagcttccatcatcagc-3'     | NM_145331.1                   |             |
|               | TAK1-E17R       | +36           | 5'-tccatttccattttttctca-3'      | NM_145331.1                   |             |

^ Numbering indicates the distance from the corresponding exon, except where otherwise indicated

\* Numbering refers to the corresponding reference mRNA sequence
